# Supplementary material for: Circular RNA circYPEL2: A Novel Biomarker in Cervical Cancer
Source: MDPI journal article supplement (doi:10.3390/genes13010038), 2021-12-23
Supplement: s1 [file s1]

**Table S1. Primers used in qRT-PCR & RT-PCR analysis**

| Name           | Sequence(5'-3')         |                          |
|----------------|-------------------------|--------------------------|
|                | Forward                 | Reverse                  |
| circYPEL2      | GCATTCACTGCAGAGCTCAC    | TAAAGGCCGTGGTTTGGCA      |
| circFCHO2      | CTTCACCAGCAATCCA ACTCC  | TCCTGATTTCCAAGGCTGACA    |
| circXPO1       | TGCAACTGACACAGCTAGGC    | GAGCTGCATGGTCTGCTAAC     |
| circCSNK1G3    | ATGTGGCAATTAAGTTGGAGCC  | GAGCATGTTTCATCCCATTCTG   |
| circYY1AP1     | TTCAGCCAAACAGCAGAAGGA   | TAGGTTGGCCAGTAGTTCCTCA   |
| mYPEL2         | CCAGAGTTCACCCCACACTC    | GCCCACAGCCCACATTA ACTA   |
| gYPEL2         | CCGAAGACATCACCAGTGT     | GGCAGATATGCCTGGAAAGT     |
| mPYGM          | TGGCCAAAGTGAAGCAGGAA    | CGCTTCACCTGGATGTCGAA     |
| mFTL           | CAGCCTGGTCAATTTGTACCT   | GCCAATTCGCGGAAGAAGTG     |
| mBMF           | TTTATGGCAATGCTGGCTATCG  | GCAATCTGTACCTCTGCTTGATG  |
| mMITF          | CGACAGAAGAACTGGAGCAC    | AAATCTGGAGAGCAGAGACCC    |
| mSLC25A22      | GCCAGCCAAGCTCATCAATG    | GAGGCAGTCGGACATGCTC      |
| mMBNL3         | TCCTGGAAACCCACCTCTT     | CATCAGTAGGGTGAGCATAG     |
| mDSG2          | CTCAGGTGTGCAGCCTACTC    | GTGGTGTTCTTAGCCGTCAT     |
| mDENNE6A       | GGGAGCCCCTTGTGGTTATG    | GGAGCTTGGGTACGGGTAGT     |
| mZNF616        | GTGATCTGGGGATCGCTACG    | TCAAATGCCCTGAGTAGCC      |
| mREEP5         | CATCGCTCTTGGTGTCATC     | CATCGCTCTTGGTGTCATC      |
| mIDH2          | CTGGCCACCCAGAAGTACAG    | GGACTAGGCGTGGGATGTTT     |
| mKLF6          | GGCCAAGTTTACCTCCGACC    | TAAGGCTTTTCTCCTGGCTTCC   |
| mITMIC         | CGAGAACTACGAGCGCATCA    | AGGTAGTCCCCCTCTTCAC      |
| mNUDT8         | GTTTCCCAGGCGGCAAGT      | ACCTCATCTACCTCCTCCGAGTT  |
| mNUTF2         | ATGCCTTACGTGGGAAGGAC    | ACCTCATCTACCTCCTCCGAGTT  |
| GAPDH          | GCACCACCAACTGCTTA       | AGTAGAGGCAGGGATGAT       |
| diverGAPDH     | TTGCCCTCAACGACCACTTT    | ACCAAATCCGTTGACTCCGA     |
| $\beta$ -actin | AGAGCTACGAGCTGCCTGAC    | AGCACTGTGTTGGCGTACAG     |
| RNU1           | ACTTACCTGGCAGGGGAGATACC | CCACTACCACAAATTATGCAGTCG |
| RNU6           | CTCGCTTCGGCAGCACA       | AACGCTTCACGAATTTGCGT     |

---

**Primer sequence for pLCDH-circYPEL2 vector construction**

---

| Name           | Sequence(5'-3')                                         |
|----------------|---------------------------------------------------------|
| OE-circYPEL2-F | CGGAATTCTGAAATATGCTATCTTACAGGCTGCTGAGAACTAGC<br>C       |
| OE-circYPEL2-R | CGGGATCCTCAAGAAAAAATATATTCACCTTGGAAATTAGTTCAT<br>CATGAT |

---
