# Supplementary material for: Circular RNA circYPEL2: A Novel Biomarker in Cervical Cancer
Source: MDPI journal article supplement (doi:10.3390/genes13010038), 2021-12-23
Supplement: s1 [file s1]

**Table S2. Differentially expressed genes enriched in GSEA hallmark pathways**

| GSEA Hallmark pathways                     | DEGs interacted with circYPEL2 |       |      |      |
|--------------------------------------------|--------------------------------|-------|------|------|
| HALLMARK_TNFA_SIGNALING_VIA_NFKB           | KLF6                           | PLAU  |      |      |
| HALLMARK_HYPOXIA                           | KLF6                           | PLAU  | PYGM | INHA |
| HALLMARK_INFLAMMATORY_RESPONSE             | KLF6                           | PLAU  |      |      |
| HALLMARK_IL2_STAT5_SIGNALING               | KLF6                           |       |      |      |
| HALLMARK_CHOLESTEROL_HOMEOSTASIS           | PLAU                           |       |      |      |
| HALLMARK_APICAL_SURFACE                    | PLAU                           |       |      |      |
| HALLMARK_COMPLEMENT                        | PLAU                           |       |      |      |
| HALLMARK_EPITHELIAL_MESENCHYMAL_TRANSITION | PLAU                           |       |      |      |
| HALLMARK_COAGULATION                       | PLAU                           |       |      |      |
| HALLMARK_KRAS_SIGNALING_UP                 | PLAU                           |       |      |      |
| HALLMARK_MYOGENESIS                        | PYGM                           | MEF2A |      |      |
| HALLMARK_ESTROGEN_RESPONSE_LATE            | IDH2                           |       |      |      |
| HALLMARK_OXIDATIVE_PHOSPHORYLATION         | IDH2                           |       |      |      |
| HALLMARK_BILE_ACID_METABOLISM              | IDH2                           |       |      |      |
| HALLMARK_PEROXISOME                        | IDH2                           |       |      |      |
| HALLMARK_APOPTOSIS                         | BMF                            | TGFB2 |      |      |
| HALLMARK_XENOBIOTIC_METABOLISM             | TGFB2                          |       |      |      |
| HALLMARK_ALLOGRAFT_REJECTION               | TGFB2                          |       |      |      |
| HALLMARK_KRAS_SIGNALING_DN                 | TGFB2                          |       |      |      |
| HALLMARK_REACTIVE_OXYGEN_SPECIES_PATHWAY   | FTL                            |       |      |      |
| HALLMARK_ADIPOGENESIS                      | REEP5                          |       |      |      |
